# Supplementary material for: Unusual accelerated rate of deletions and insertions in toxin genes in the venom glands of the pygmy copperhead (Austrelaps labialis) from kangaroo island
Source: PubMed Central journal article supplement (PMC2287176; doi:10.1186/1471-2148-8-70), 2008-02-28
Supplement: 1471-2148-8-70-S1.pdf [file 1471-2148-8-70-S1.pdf]

# Additional file 1: Nucleotide sequence of long-chain neurotoxins showing insertions and deletions of nucleotides.▼, insertion; ✖, deletion and □, stop codon.

```

8A ATGAAAACTCTGCTGCTGACCTTGGTGGTGGTACAAATCGTGTGCCTGGACTTAGGTAACAGCTTCTCATGCTACAAAAACCTTCATGTTAAATCT 96
5B ATGAAAACTCTGCTGCTGACCTTGGTGGTGGTACAAATCGTGTGCCTGGACTTAGGTAACAGCTTCTCATGCTACAAAAACCTTGGTGTAAATCT 96
160 ATGAAAACTCTGCTGCTGACCTTGGTGGTGGTACAAATCGTGTGCCTGGACTTAGGTAACAGCTTCTCATGCTACAAAAACCTTCATGTTAAATCT 96
646 ATGAAAACTCTGCTGCTGACCTTGGTGGTGGTACAAATCGTGTGCCTGGACTTAGGTAACAGCTTCTCATGCTACAAAAACCTTCATGTTAAATCT 96
509 ATGAAAACTCTGCTGCTGACCTTGGTGGTGGTACAAATCGTGTGCCTGGACTTAGGTTGGCTTGATATGCTACCTGGGACGTAATACCCTGGG 96
21 ATGAAAACTCTGCTGCTGACCTTGGTGGTGGTACAAATCGTGTGCCTGGACTTAGGTTGGCTTGATATGCTACATGGGACCTAAAACCCCTCGG 96
242 ATGAAAACTCTGCTGCTGACCTTGGTGGTGGTACAAATCGTGTGCCTGGACTTAGGTTGGCTTGATATGCTACATGGGACCTAAAACCCCTCGG 96
112 ATGAAAACTCTGCTGCTGACCTTGGGTTGGTGGTACAAATCGTGTGCCTGGACTTAGGTAACAGCTTCTCATGCTACAAAAACCTTCATGTTAAATCT 96

      *             **    **
8A GAGCCTTGTGCACCTGGGCAGAACCTATGCTATACAAAGACTTGGTGTGATCGTTTTTGTTCATCAGAGGAAAGGTAATCGAACTGGGATGTGCT 192
5B GAGCCTTGTGCACCTGGGCAGAACCTATGCTATACAAAGACTTGGTGTGATCGTTTTTGTGGCAGACAGAGGAAAGCGAGTTGAAATGGGATGTGCT 192
160 GAGCCTTGTGCACCTGGGCAGAACCTATGCTATACAAAGACTTGGTGTGATCGTTTTTGTTCATCAGAGGAAAGCTAACTCGAACTGGGATGTGCT 191
646 GAGCCTTGTGCACCTGGGCAGAACCTATGCTATACAAAGACTTGGTGTGATCGTTTTTGTTCATCAGAGGAAAGCTAACTCGAACTGGGATGTGCT 191
509 A...CTTGTCACCTGGGCAGGAGCTATGCTACATA.GTGG...GGTGTGGTGCITTTTTGTACCGTCAGAAG....AGTCAAATGGGATGTGCT 180
21 A...CTTGTCACCTGGGCAGAACCTATGCTATACAAAGACTTGGTGTGATCGTTTTTGTGGCAGCAGAGGAAAGGTAGTCGTATTGGGATGTGCT 189
242 A...CTTGTCACCTGGGCAGAACCTATGCTTACAAAGACTTGGTGTGATCGTTCCGCTTAGCCTCCTAGGAAAGTTAGTCAAATGGGATGTGCT 189
112 GAGCCTTGTGCACCTGGGCAGAACCTATGCTATACAAAGACTTGGGTTGGTGTGATCGTTTTTGTTCATCAGAGGAAAGGTAATCGAACTGGGATGTGCT 192

      *                                     ** ▼▼          ✖▼▼
8A GCTACTTGCCTCCAGCGGAGCCAAAAAGGATATTACCTGTTGCTCAACAGACAAITGCAACCCACATCCGTTAA]..... 267
5B GCTACTTGCCTACAGTGAAGCCCGGTGGATATTACCTGTTGCTCAACAGACAAITGCAACCCATTCC...AA...CACACTCTCGTTGA].. 282
160 GCTACTTGCCTCCAGCGGAGCCAAAAAGGATATTACCTGTTGCTCAACAGACAAITGCAACCCACATCCGTA...CAGAAAA...CTCGTTGA.. 281
646 GCTACTTGCCTCCAGCGGAGCCAAAAAGGATATTACCTGTTGCTCAACAGACAAITGCAACCCACATCCGTA...CAGAAAA...CTCGTTGA.. 281
509 GCTACTTGCCTATACCGAAGCGGTATGAGAAGTTACCTGTTGCTCAACAGACAAITGCAACCAATTTCGG...ACACAGAAA...TCTCGTTGA].. 270
21 GCTACTTGCCTACAGTGAAGCCCGGTGGATATTACCTGTTGCTCAACAGACAAITGCAACCCATTCCAAAA...ACGAAAG...CTCCTGGGA 281
242 GCTACTTGCCTATACCGAAGTCCCTATGAGGATGTTACCTGTTGCTCAACAGACAAITGCAACAGATTTCGAAATGGGAACGTTCTAGACCAGT 285
112 GCTACTTGCCTCCAGCGGAGCC...AAAAAGGATATTACCTGTTGCTCAACAGACAAITGCAACCCACATCCGTAACAGAAAAAAGTTGAGTTTG 287

8A ..... 267
5B ..... 282
160 ..... 281
646 ..... 281
509 ..... 270
21 ACGTCTTGA]..... 291
242 CCTCGAGGTTGCTCTCATCCATCATGGACCATCC]TGA]..... 324
112 CTCTCATCCATCATGGACCATCCTGAAAAATTATGCTTGTGCGCTTACCGCAGATGTTCCATCATCCCCCTCTCCCTGCTGTTTGACATC 383

8A ..... 267
5B ..... 282
160 ..... 281
646 ..... 281
509 ..... 270
21 ..... 291
242 ..... 324
112 TCAACATCTTTCCCTTTCTCTCGTTCTGTACGTTTCCTTCTGCTAGTTCTCTAG]..... 438

```
