# Supplementary material for: Unusual accelerated rate of deletions and insertions in toxin genes in the venom glands of the pygmy copperhead (Austrelaps labialis) from kangaroo island
Source: PubMed Central journal article supplement (PMC2287176; doi:10.1186/1471-2148-8-70), 2008-02-28
Supplement: 1471-2148-8-70-S2.pdf [file 1471-2148-8-70-S2.pdf]

**Additional file 2: Nucleotide sequence of PLA<sub>2</sub> showing insertion.  
 ▼, insertion and □, stop codon.**

|     |                                                                                                    |     |
|-----|----------------------------------------------------------------------------------------------------|-----|
| 636 | ATGTATGCTGCTCACCTTCTGGTCTGTTGGTAGTTTGTGTCTCCCTCTTAGGAGCTGCCAGCATTCTCCGCAGCCTCTCAACCTCGTACAATTC     | 96  |
| 518 | ATGTATCCTGCTCACCTTCTGGTCTGTTGGCAGTTTGTGTCTCCCTCTTAGGAGCTGCCAGCATTCTCCGCAGCCTCTCAACCTCGTACAATTC     | 96  |
|     |                                                                                                    |     |
| 636 | AGCTACTTGATTCAATGTGCCAACCATGGCAGTCGAGCTACTTGGCATTATACGGACTACGGTTGCTACTGCGGCTCAGGAGGTAGCGGGACACC    | 192 |
| 518 | GGCTACTTGATTCAATGTGCCAACCATGGCAGTCGAGCTACTTGGCATTATACGGACTACGGTTGCTACTGCGGCTCAGGAGGTAGCGGGACGCC    | 192 |
|     |                                                                                                    |     |
| ▼   |                                                                                                    |     |
| 636 | GTGGATGAGTTGGATAGGTGCTGCCAGACTCATGACAACCTGCTATGCTGAAGCCG.AAAAAAAGGATGCTACCCAAGATATCGGCGTATGATTA    | 287 |
| 518 | GTGGATGAGTTGGATAGGTGCTGCCAGACTCATGACAACCTGCTATGCTGAAGCCG.AAAAAAAGGATGCTACCCAAGATGTCGGCGTATGAATTA   | 288 |
|     |                                                                                                    |     |
| 636 | CTACTGTGGCGAAAAATGGACCCTACTGCAGAAATATCAAAAAGGAGTGCAACGTTTTGTGTGTGATTGTGACGTGCAAGCAGCCTTCTGCTTTGC   | 383 |
| 518 | CTACTGTGGCGAAAAATGGACCCTACTGCAGAAATATCAAAAAGGAGTGCAACGTTTTGTGTGTGATTGTGACGTGCAAGCAGCCTAAGTGTCTTTGC | 384 |
|     |                                                                                                    |     |
| 636 | CAGAGCCCCTTACAACGACGCGAACTGGAATATCGACACCAAGACACGTTGTCAA□GA                                         | 441 |
| 518 | CAGAGCCCCTTACAACGACGCGAACTGGAATATCGACACCAAGAAACGTTGTCAATGA                                         | 442 |
