# Supplementary material for: Unusual accelerated rate of deletions and insertions in toxin genes in the venom glands of the pygmy copperhead (Austrelaps labialis) from kangaroo island
Source: PubMed Central journal article supplement (PMC2287176; doi:10.1186/1471-2148-8-70), 2008-02-28
Supplement: 1471-2148-8-70-S3.pdf [file 1471-2148-8-70-S3.pdf]

**Additional file 3: Nucleotide sequence of CRISPs showing insertions and deletions of nucleotides.▼, insertion; \*, deletion and □, stop codon.**

|           |                                                                                                      |     |
|-----------|------------------------------------------------------------------------------------------------------|-----|
| Oxyuranus | ATGATTGCCTTCATTGTCTTGCTAAGCTTGTGTCAGTGTGCAACAGCTTCTTGGAACTGTTGATTTTGCTTCTGAGTCAAGTAACAAAAAAGAT       | 96  |
| 521       | ATGATTGCCTTCATTGTCTTGCTAAGCTTGTGTCAGTGTGCAACAGCTTCTTGGAACTGTTGATTTTGCTTCTGAGTCAAGTAACAAAAAAGAT       | 96  |
| 218       | ATGATTGCCTTCATTGTCTTGCTAAGCTTGTGTCAGTGTGCAACAGCTTCTTGGAACTGTTGATTTTGCTTCTGAGTCAAGTAACAAAAAAGAT       | 96  |
| 492       | ATGATTGCCTTCATTGTCTTGCTAAGCTTGTGTCAGTGTGCAACAGCTTCTTGGAACTGTTGATTTTGCTTCTGAGTCAAGTAACAAAAAAGAT       | 96  |
| 399       | ATGATTGCCTTCATTGTCTTGCTAAGCTTGTGTCAGTGTGCAACAGCTTCTTGGAACTGTTGATTTTGCTTCTGAGTCAAGTAACAAAAAAGAT       | 96  |
| 217       | ATGATTGCCTTCATTGTCTTGCTAAGCTTGTGTCAGTGTGCAACAGCTTCTTGGAACTGTTGATTTTGCTTCTGAGTCAAGTAACAAAAAAGAT       | 96  |
| 363       | ATGATTGCCTTCATTGTCTTGCTAAGCTTGTGTCAGTGTGCAACAGCTTCTTGGAACTGTTGATTTTGCTTCTGAGTCAAGTAACAAAAAAGAT       | 96  |
|           |                                                                                                      |     |
| Oxyuranus | TACCGAAAGGAGATTGTTGACAAGCACAATGATTTAAGGAGATCAGTGAAACCAACTGTAGGAACATGTTACAAATGAAATGGAATTCCTGCTGCT     | 192 |
| 521       | TACCGAAAGGAGATTGTTGACAAGCACAATGCTTTAAGGAGATCAGTGAAACCAACTGTAGGAACATGTTACAAATGGAATGGAATTCCTGCTGCT     | 192 |
| 218       | TACCGAAAGGAGATTGTTGACAAGCACAATGCTTTAAGGAGATCAGTGAAACCAACTGTAGGAACATGTTACAAATGGAATGGAATTCCTGCTGCT     | 192 |
| 492       | TACCGAAAGGAGATTGTTGACAAGCACAATGCTTTAAGGAGATCAGTGAAACCAACTGTAGGAACATGTTACAAATGGAATGGAATTCCTGCTGCT     | 192 |
| 399       | TACCGAAAGGAGATTGTTGACAAGCACAATGCTTTAAGGAGATCAGTGAAACCAACTGTAGGAACATGTTACAAATGGAATGGAATTCCTGCTGCT     | 192 |
| 217       | TACCGAAAGGAGATTGTTGACAAGCACAATGCTTTAAGGAGATCAGTGAAACCAACTGTAGGAACATGTTACAAATGGAATGGAATTCCTGCTGCT     | 192 |
| 363       | TACCGAAAGGAGATTGTTGACAAGCACAATGCTTTAAGGAGATCAGTGAAACCAACTGTAGGAACATGTTACAAATGGAATGGAATTCCTGCTGCT     | 192 |
|           |                                                                                                      |     |
| Oxyuranus | GCTCAAAATGCAAAACGTTGGGCAGATAGATGTACTTTTGTCTCACAGTCCACCACATACAAGAAGTGTGGGAAAACCTCCGTTGTGGTGAAAAATATA  | 288 |
| 521       | GCTCAAAATGCAAAACGTTGGGCAGATAGATGTACTTTTGTCTCACAGTCCACCACATACAAGAAGTGTGGGAAAACCTCCGTTGTGGTGAAAAATATA  | 288 |
| 218       | GCTCAAAATGCAAAACGTTGGGCAGATAGATGTACTTTTGTCTCACAGTCCACCACATACAAGAAGTGTGGGAAAACCTCCGTTGTGGTGAAAAATATA  | 288 |
| 492       | GCTCAAAATGCAAAACGTTGGGCAGATAGATGTACTTTTGTCTCACAGTCCACCACATACAAGAAGTGTGGGAAAACCTCCGTTGTGGTGAAAAATATA  | 288 |
| 399       | GCTCAAAATGCAAAACGTTGGGCAGATAGATGTACTTTTGTCTCACAGTCCACCACATACAAGAAGTGTGGGAAAACCTCCGTTGTGGTGAAAAATATA  | 288 |
| 217       | GCTCAAAATGCAAAACGTTGGGCAGATAGATGTACTTTTGTCTCACAGTCCACCACATACAAGAAGTGTGGGAAAACCTCCGTTGTGGTGAAAAATATA  | 288 |
| 363       | GCTCAAAATGCAAAACGTTGGGCAGATAGATGTACTTTTGTCTCACAGTCCACCACATACAAGAAGTGTGGGAAAACCTCCGTTGTGGTGAAAAATATA  | 288 |
|           |                                                                                                      |     |
| Oxyuranus | TTCATGTCAACTCAACCTTTTGCATGGAGTGGCGTAGTTCAGGCTTGGTATGA.▼TGAAAGTC. AAAAAAATTCGCTATGGCATTGGAGCAAAGCCAC  | 382 |
| 521       | TTCATGTCAACTCAACCTTTTGCATGGAGTGGCGTAGTTCAGGCTTGGTATGA.▼TGAAAGTC. AAAAAAATTCGCTATGGCATTGGAGCAAAGCCAC  | 382 |
| 218       | TTCATGTCAACTCAACCTTTTGCATGGAGTGGCGTAGTTCAGGCTTGGTATGA.▼TGAAAGTC. AAAAAAATTCGCTATGGCATTGGAGCAAAGCCAC  | 382 |
| 492       | TTCATGTCAACTCAACCTTTTGCATGGAGTGGCGTAGTTCAGGCTTGGTATGA.▼TGAAAGTC. AAAAAAATTCGCTATGGCATTGGAGCAAAGCCAC  | 382 |
| 399       | TTCATGTCAACTCAACCTTTTGCATGGAGTGGCGTAGTTCAGGCTTGGTATGA.▼TGAAAGTC. AAAAAAATTCGCTATGGCATTGGAGCAAAGCCAC  | 383 |
| 217       | TTCATGTCAACTCAACCTTTTGCATGGAGTGGCGTAGTTCAGGCTTGGTATGA.▼TGAAAGTC. AAAAAAATTCGCTATGGCATTGGAGCAAAGCCAC  | 383 |
| 363       | TTCATGTCAACTCAACCTTTTGCATGGAGTGGCGTAGTTCAGGCTTGGTATGA.▼TGAAAGTC. AAAAAAATTCGCTATGGCATTGGAGCAAAGCCAC  | 384 |
|           |                                                                                                      |     |
| Oxyuranus | CAAGTCTGTATTGGCCATTATACCCAGGTAGTTTGGTACAAAAGTACCTTCTTGGTTGTGCTTCTGCCAAATGTTCTTCAACCAAAATACCTCT       | 478 |
| 521       | CAGGTTCTGTATTGGCCATTATACCCAGGTAGTTTGGTACAAAAGTACCTTCTTGGTTGTGCTTCTGCCAAATGTTCTTCAACCAAAATACCTCT      | 478 |
| 218       | CAGGTTCTGTATTGGCCATTATACCCAGGTAGTTTGGTACAAAAGTACCTTCTTGGTTGTGCTTCTGCCAAATGTTCTTCAACCAAAATACCTCT      | 478 |
| 492       | CAGGTTCTGTATTGGCCATTATACCCAGGTAGTTTGGTACAAAAGTACCTTCTTGGTTGTGCTTCTGCCAAATGTTCTTCAACCAAAATACCTCT      | 478 |
| 399       | CAGGTTCTGTATTGGCCATTATACCCAGGTAGTTTGGTACAAAAGTACCTTCTTGGTTGTGCTTCTGCCAAATGTTCTTCAACCAAAATACCTCT      | 479 |
| 217       | CAGGTTCTGTATTGGCCATTATACCCAGGTAGTTTGGTACAAAAGTACCTTCTTGGTTGTGCTTCTGCCAAATGTTCTTCAACCAAAATACCTCT      | 479 |
| 363       | CAGGTTCTGTATTGGCCATTATACCCAGGTAGTTTGGTACAAAAGTACCTTCTTGGTTGTGCTTCTGCCAAATGTTCTTCAACCAAAATACCTCT      | 480 |
|           |                                                                                                      |     |
| Oxyuranus | ACG. TTTGTCAATACTGCCAGCAGGGAACATCAGAGGTTCAATTGCTACTCCATATAAATCAGGGCCACCTTTGTTGGGGACTGTCCTTCGGCTTGT   | 573 |
| 521       | ACG. TTTGTCAATACTGCCAGCAGGGAACATCAGAGGTTCAATTGCTACTCCATATAAATCAGGGCCCGC. .TGGTGGGACTGTCCTTCGGGTGG.   | 569 |
| 218       | ACG. TTTGTCAATACTGCCAGCAGGGAACATCAGAGGTTCAATTGCTACTCCATATAAATCAGGGCCAGCTTTGTTGGGGACTGTCCTTCGGCTTGT   | 573 |
| 492       | ACG. TTTGTCAATACTGCCAGCAGGGAACATCAGAGGTTCAATTGCTACTCCATATAAATCAGGGCCAGCTTTGTTGGGGACTGTCCTTCGGGTGG    | 573 |
| 399       | ACCTTTTGTCAATACTGCCAGCAGGGAACATCAGAGGTTCAATTGCTACTCCATATAAATCAGGGCCAGCTTTGTTGGGGACTGTCCTTCGGGTGG     | 575 |
| 217       | ACG. TTTGTCAATACTGCCAGCAGGGAACATCAGAGGTTCAATTGCTACTCCATATAAATCAGGGCCAGCTTTGTTGGGGACTGTCCTTCGGGTGG    | 574 |
| 363       | ACG. TTTGTCAATACTGCCAGCAGGGAACATCAGAGGTTCAATTGCTACTCCATATAAATCAGGGCCAGCTGTTGGGGACTGTCCTTCGGG. TGT    | 574 |
|           |                                                                                                      |     |
| Oxyuranus | GACAAACGGACTATGCACAAATCCTTGCACAAATAACAGTAGTCTTACGAACTGCAAACTTTAGCGAAAAAAGTAAATGCCAGACTGAATGGATC      | 669 |
| 521       | GTC. ACGGACTATGCCCAA. T. CTTGCAAA. A TGAAGTGCCTTCCC. AACTGCAAGGCTTTACCGAAAAAAGTAAATGCAAGACTGAATGGATC | 660 |
| 218       | GTC. ACGGACTATGCACAAATCCTTGCACAAATATGAAGATGCCTTACGAACTGCAAACTTTGGCGAAAAA. (TAA)ATGCAAGACTGAATGGATC   | 667 |
| 492       | GTC. ACGGACTATGCACAAATCCTTGCACAAATATGAAGATGCCTTCCC. AACTGCAAGGCTTTACCGAAAAAAGTAAATGCAAGACTGAATGGATC  | 667 |
| 399       | GTCACCGGACTATGCACAAATCCTTGCACAAATATGAAGATGCCTTACGAACTGCAAACTTTAGCGAAAAAAGTAAATGCAAGACTGAATGGATC      | 671 |
| 217       | GTCACCGGACTATGCACAAATCCTTGCACAAATATGAAGATGCCTTACGAACTGCAAACTTTAGCGAAAAAAGTAAATGCAAGACTGAATGGATC      | 670 |
| 363       | GTC. ACGGACTATGCCCAAATCCTTGC. AATATG. AGATGCCTTCC. CGAACTGCAAACTTTAGCGAAAAAAGTAAATGCAAGACTGAATGGATC  | 666 |
|           |                                                                                                      |     |
| Oxyuranus | AAGTCAAAATGCTCTGCTACTTGTCTTCTGCCACACTGAATAATAATAG. ....                                              | 717 |
| 521       | AAGTCAAAATGCCCTGCTACTTGTCTTCTGCCACAATAAAATAATATAG. ....                                              | 708 |
| 218       | AAGTCAAAATGCCCTGCTACTTGTCTTCTGCCACAATAAAATAATATAG. ....                                              | 715 |
| 492       | AAGTCAAAATGCCCTGCTACTTGTCTTCTGCCACAATAAAATAATATAG. ....                                              | 715 |
| 399       | AAGTCAAAATGCCCTGCTACTTGTCTTCTGCCACAATAAAATAATATAG. ....                                              | 719 |
| 217       | AAGTCAAAATGCCCTGCTACTTGTCTTCTGCCACAATAAAATAATATAG. ....                                              | 718 |
| 363       | AAGTCAAAATGCCCTGCTACTTGTCTTCTGCCACAATAAAATAATATAG. ....                                              | 714 |
